# Supplementary material
Source: publisher figshare collection journal article supplement (https://geolsoc.figshare.com/ndownloader/files/36235986)
Supplement: Supplementary file 1 [file 36235986]

## Sheet: SM Table 2_detailed geochem
Sample	15JB45	15JB53	PRR-6061	PRR-6031	PRR-6000	PRR-24285	PRR-24201	PRR-5990	PRR-5991	PRR-6034	PRR-5994	PRR-5992	PRR-5998	PRR-5999	PRR-5985	PRR-6023	PRR-6025	PRR-24226	N11.8.1	N11.142.1	J6.307.1	J6.290.1	J6.386.1	N11.12.1	R.5939.2	R.5979.1	R.5793.2	R.5905.4	J6.297.1	R.6317.1	R.5297.1	R.6057.3	N11.3.1	P14.03.1
Internal code	15JB45	15JB53	15JB62	15JB64	15JB65	15JB67	15JB69	15JB76	15JB77	15JB79	15JB80	15JB82	15JB83	15JB84	15JB86	16JB62	16JB63	16JB77	18JB06	18JB08	18JB09	18JB10	18JB12	18JB14	18JB17	18JB21	18JB23	18JB24	18JB28	18JB30	18JB31	18JB36	18JB55	18JB67
Age	132	106	112	105	105	102	112	120	117	115	79	93	107	135	139	139	132	103	112	114	137	137	119	119	82	135	105	102	106	113	126	116	112	115
Error	1	4	3	1	3	2	1	2	1	1	1	1	1	1	1	1	6	1	4	2	4	2	1	2	1	3	4	1	1	1	1	1	1	1
Method	U-Pb Zircon	U-Pb Zircon	U-Pb Zircon	U-Pb Zircon	U-Pb Zircon	U-Pb Zircon	U-Pb Zircon	U-Pb Zircon	U-Pb Zircon	U-Pb Zircon	U-Pb Zircon	U-Pb Zircon	U-Pb Zircon	U-Pb Zircon	U-Pb Zircon	U-Pb Zircon	U-Pb Zircon	U-Pb Zircon	U-Pb Zircon	U-Pb Zircon	U-Pb Zircon	U-Pb Zircon	U-Pb Zircon	U-Pb Zircon	U-Pb Zircon	U-Pb Zircon	U-Pb Zircon	U-Pb Zircon	U-Pb Zircon	U-Pb Zircon	U-Pb Zircon	U-Pb Zircon	U-Pb Zircon	U-Pb Zircon
South	-67.8167	-68.1333	-68.1333	-67.8167	-67.8167	-67.4663	-67.5972	-67.2714	-70.222	-70.9316	-70.9367	-71.2797	-67.6278	-71.506	-70.6333	-70.3914	-64.7696	-64.8251	-64.8833	-65.25	-63.2167	-63.2167	-64.5667	-64.5667	-65.2833	-64.9	-65.2	-65.2	-62.7333	-71.4982	-71.4175	-71.7272	-71.5645	-74.3241
West	-67.1833	-67.1167	-67.1167	-67.1833	-67.1833	-68.5346	-68.7449	-68.1942	-66.6779	-66.2556	-66.8033	-66.1322	-68.7542	-67.1154	-67.15	-67.9228	-64.0903	-62.8574	-62.55	-64.0833	-62.25	-62.25	-61.55	-61.55	-64.1	-63.05	-64.1	-64.1	-61.2	-63.0104	-63.5814	-62.5239	-62.8213	-64.6307
SiO2	76.4866	63.3049	62.9552	76.2909	76.1185	67.83	64.2647	62.4665	45.624	63.2955	64.7909	71.3958	64.2158	71.784	64.679	57.7048	74.6596	70.3289	74.2543	74.0051	68.8206	65.0247	74.7132	77.6053	51.3941	77.5014	55.2656	54.9365	66.7394	67.5183	61.9895	61.3588	61.2493	75.6331
TiO2	0.0897028	0.811216	0.00366667	0	0.0897389	0.585333	0.695	0.722333	1.32867	0.704	0.511667	0.354333	0.969667	0.312	0.887667	0.942667	0.459538	0.424143	0.209055	0.208297	0.456357	0.536588	0.109361	0.002	0.00933333	0	1.31567	1.446	0.653	0.00333333	0.548667	0.603667	0.485333	0.353667
Al2O3	12.6082	16.9855	16.5833	12.7567	12.8327	17.586	21.7087	17.338	20.1793	17.062	17.2857	16.306	16.7013	14.237	15.8997	16.394	13.684	14.9141	13.4691	13.4699	14.2562	14.4489	13.4215	12.041	17.8304	12.3105	17.5028	16.4007	14.2937	14.0335	17.689	17.1627	18.0217	14.137
Fe2O3	1.1761	4.99749	4.75507	1.13703	1.16661	2.19479	3.21913	6.24567	9.83405	4.4293	3.74408	2.33922	5.578	2.46639	5.46864	7.65958	3.26783	3.58056	1.80185	1.68622	4.81159	6.20491	1.2825	1.25282	10.1576	0.966898	8.05463	9.41853	4.08115	5.44808	6.01236	6.3872	6.04146	3.12032
FeO	1.05849	4.49774	4.27957	1.02333	1.04995	1.97531	2.89721	6.94131	8.85064	3.98637	3.36967	2.1053	6.19928	2.7411	6.07773	8.5127	2.94104	3.2225	1.62167	1.51759	4.33043	5.58442	1.15425	1.12754	9.1418	0.870208	7.24916	8.47668	3.67304	4.90327	5.41113	7.0986	6.71436	3.46787
MnO	0.0598019	0.14021	0.001	0	0.0697969	0.049	0.022	0.0786667	0.12	0.0603333	0.07	0.081	0.118	0.0363333	0.114	0.146667	0.0816957	0.157821	0.0597299	0.0793514	0.099208	0.156098	0.0497094	0.001	0.001	0	0.136333	0.1745	0.089	0.001	0.129667	0.117	0.127667	0.0606667
MgO	0.0897028	1.81272	1.61474	0.0797918	0.0897389	1.42016	1.0894	1.13915	7.4699	2.43216	1.58664	0.674012	1.60073	0.576818	1.87922	4.11752	0.929288	0.897605	0.3982	0.307486	1.10121	1.47318	0.208779	0.218747	4.62159	0.0398721	3.83459	3.79316	1.59571	2.0119	2.61622	2.68203	2.42454	1.30179
Mg	0.054094	1.09313	0.973748	0.0481173	0.0541158	0.856407	0.656947	0.686947	4.50462	1.46668	0.956799	0.406454	0.965297	0.347842	1.13324	2.48301	0.560394	0.541288	0.240129	0.185425	0.664069	0.888379	0.125902	0.131912	2.78698	0.0240443	2.3124	2.28741	0.962272	1.21325	1.57767	1.61736	1.46208	0.785027
CaO	0.378745	4.47671	4.31	0.41	0.448695	7.24	2.34	5.25	11.51	5.04	3.24	2.57	7.42	1.98	4.95	7.43	3.20655	3.12682	1.9014	0.684405	2.92664	3.38538	1.24273	0.56	10.27	0.39	7.46	7.4	4.61	4.46	5.97	5.81	6.38	2.75
Na2O	4.18613	4.68703	4.34891	4.22897	4.24764	3.39646	3.7491	4.08522	2.88068	3.79654	4.21813	3.19165	3.07379	3.19239	3.59936	3.26425	4.49326	4.01456	3.71321	4.6123	4.22626	3.88295	3.81768	3.79824	3.00155	3.74798	3.92354	3.91201	3.41386	2.45014	2.82354	3.03963	3.0108	2.22596
K2O	4.51504	2.58387	2.68463	4.56808	4.59663	0.258211	2.79711	0.648136	0.437069	2.44205	2.81531	2.89429	0.255331	4.13718	1.26276	0.892956	1.26628	0.976516	3.64353	3.98741	2.15281	1.9805	4.33466	3.82807	0.496945	4.70491	1.26502	1.2974	0.928414	2.79874	1.9054	2.01649	1.76872	4.38237
P2O5	0.019934	0.26039	0.217941	0.0299219	0.019942	0.0993118	0.0588864	0.117843	0.387402	0.197737	0.164469	0.0892075	0.166947	0.0696159	0.188916	0.119061	0.0919076	0.0690466	0.0796399	0.0495946	0.109129	0.12683	0.0298256	0.0298291	0.119267	0.00996802	0.286606	0.326826	0.125723	0.129479	0.167833	0.139068	0.109303	0.0695614
Cr2O3	0	0	0	0	0	0.00993118	0	0	0.0198668	0.00988683	0	0	0	0	0	0.00992173	0	0	0	0	0	0	0	0	0.0099389	0	0.00988298	0.00990382	0	0	0	0	0	0
Total	0.019934	0.26039	99.36	99.91	0.019942	100.26	100.22	99.02	99.07	98.97	100.19	99.94	101.35	98.42	98.2	98.38	0.0919076	0.0690466	0.0796399	0.0495946	0.109129	0.12683	0.0298256	100.05	99.84	100.07	99.98	99.81	99.69	99.8	99.62	99.15	99.4	103.73
LOI	0.33	-0.15	0.93	0.26	0.29	0.69	1.86	1.78	0.66	1.12	3.26	0.88	1.82	0.54	0.56	0.77	-2.12	1.36	0.45	0.81	0.79	2.43	0.58	0.57	0.61	0.32	1.17	0.96	3.28	0.4	1.27	0.66	0.63	0.65
Be	4.259	2.651	0.896	0.370667	4.612	3.25067	3.89	1.97833	1.938	3.45867	3.80833	3.64833	2.579	6.20333	2.90667	1.93333	1.684	2.24667	2.81533	3.39133	3.15453	3.15157	2.99044	2.70367	0.566667	1.69267	1.53733	1.517	1.68967	1.479	3.01567	1.95	1.96067	1.923
Sc	5.22833	21.9736	3.45733	0.261333	5.63367	13.4823	20.3037	19.5347	36.2053	14.8043	11.8123	9.488	14.874	15.388	20.5563	31.4333	13.2487	8.843	4.08633	5.20967	17.943	17.9763	19.4819	4.57633	10.7637	2.04567	24.4627	29.673	15.19	6.33633	18.4907	19.5147	15.918	13.2193
Ni	1.054	14.5971	2.746	0.786333	1.48767	10.0373	6.497	6.00967	73.8093	21.6973	5.114	5.68733	3.98367	5.162	2.69807	26.622	3.64167	5.247	1.843	2.25933	12.1453	12.2129	14.1933	2.725	11.9797	2.126	23.2457	11.6465	7.82433	5.575	12.0313	7.185	3.701	8.65
Cu	2.272	110.577	1.85633	0.334667	3.41167	40.3217	12.204	135.121	45.913	10.3377	3.293	2.876	7.39733	29.169	28.6243	36.5653	19.304	4.42733	2.227	3.745	78.9615	78.9095	83.6659	3.337	51.435	1.705	33.9827	40.3095	11.4047	8.80933	5.747	16.7677	9.43667	22.5593
Zn	29.3293	61.1152	5.15233	0.063	40.6793	78.21	111.481	69.528	64.6047	73.209	75.6353	105.425	51.581	38.2127	64.7147	82.3833	44.137	79.1677	22.0433	42.3997	55.2579	55.257	56.3335	4.87467	7.57567	1.05967	75.8437	87.687	47.0707	5.346	63.5447	60.2377	62.9677	39.6113
Rb	168.524	62.1147	0.745333	0.00666667	175.741	4.87733	93.8643	19.148	3.88767	51.6843	121.075	109.247	9.66433	142.445	47.5497	19.9267	27.3877	40.998	131.219	127.345	91.2566	91.0831	81.7134	5.00733	0.125	2.01967	35.441	31.649	51.5983	1.53167	61.7363	69.482	66.8537	150.448
Sr	36.3683	328.553	76.4047	0.250333	35.308	360.617	478.981	792.959	1109.41	803.155	422.09	383.574	819.312	235.523	450.024	288.646	192.972	369.719	226.73	136.373	253.539	253.997	278.371	35.9183	94.7017	4.66567	555.041	478.421	307.486	41.077	425.567	309.946	323.788	269.182
Y	29.751	23.2698	1.57733	0.0776667	35.7063	15.2287	45.019	15.9787	22.0927	8.056	14.6757	10.4393	19.463	40.483	26.862	28.1313	30.8227	12.9103	12.484	19.4027	26.4953	26.4781	25.488	2.90567	1.683	2.13	15.6477	27.8025	17.961	2.744	17.3303	21.8767	19.6157	9.098
Zr	120.72	95.4414	8.567	0.0203333	115.908	186.462	362.737	95.3443	30.3833	193.527	177.829	130.57	416.407	129.846	213.446	132.173	153.834	172.901	113.17	135.038	101.431	101.439	100.483	4.31033	1.78267	1.438	67.9127	93.583	149.225	4.88133	100.223	143.951	105.563	69.7723
Nb	11.7303	6.98422	1.21367	0.162667	14.4037	7.91	12.3057	3.52967	3.804	5.906	8.40733	11.8817	8.142	12.0473	7.15667	2.34367	2.41933	5.01167	7.939	9.054	8.96264	8.95525	8.41807	2.68933	0.661333	2.084	3.547	3.3775	3.73367	1.93667	6.06667	6.737	6.99667	4.50167
Mo	0.946333	0.876333	1.253	1.33867	1.39933	0.781667	0.792667	0.704667	0.452667	0.867	0.512667	0.800667	0.681333	0.674333	0.808	1.18633	0.821	0.489	0.219667	0.343667	1.01821	1.01781	0.982333	0.613	0.475667	0.648667	0.555333	0.702	1.09033	0.533333	0.763667	1.56133	0.57	0.889
Cs	2.38067	2.25856	1.46133	0.754333	2.38833	0.449333	3.93833	0.461667	0.11	0.849	4.059	3.61133	1.67133	1.81733	1.13167	0.637	0.876	2.41	1.82933	1.178	2.17546	2.16919	2.04352	2.00733	0.252667	1.48767	1.48667	0.8795	15.6283	2.62867	1.518	2.58733	2.50133	4.05
Ba	426.075	243.854	4.571	0.005	443.69	91.4747	915.911	254.632	162.217	1047.19	854.055	1060.05	71.8827	748.483	577.341	190.148	208.103	338.007	578.632	723.862	300.747	300.736	289.83	6.79067	1.631	2.03267	322.946	296.42	301.859	4.24667	491.694	378.137	455.891	670.991
La	34.606	18.1736	4.264	0.0563333	32.771	36.5013	132.059	10.2907	10.1683	26.9817	27.3253	32.305	24.7883	27.643	34.268	10.647	9.77233	17.9997	22.2873	33.0947	21.9337	21.9122	20.7246	3.16467	0.636333	1.10933	12.815	12.111	15.534	3.94933	30.8607	42.2317	25.2733	14.677
Ce	74.6777	39.4662	3.17933	0.026	70.039	63.9677	262.604	18.945	29.0173	50.8807	53.3403	57.6923	47.8617	55.7617	70.9247	26.2953	23.534	35.196	42.4743	61.968	47.297	47.2497	44.7185	3.253	0.652	1.194	28.0093	27.9875	30.3883	3.37633	56.2657	73.397	49.5873	26.236
Pr	8.39633	4.84722	2.78467	0.232667	7.98533	6.34067	30.2277	2.259	4.57033	5.38	5.74767	5.53967	5.48867	6.313	7.65133	3.439	3.06433	3.60233	4.38767	6.292	5.64749	5.64246	5.37919	1.66233	0.686	1.07	3.57633	3.8	3.392	2.72367	6.053	7.226	5.41533	2.70333
Nd	32.0243	20.3636	2.825	0.057	30.881	22.8123	127.352	9.956	24.0677	20.333	21.286	18.578	22.1253	25.665	29.308	15.7607	13.8357	13.247	15.42	22.093	23.0442	23.0273	22.1434	2.18967	0.976333	1.13567	16.3243	18.454	13.9957	2.92	22.5263	25.2797	20.2553	9.57233
Sm	6.26933	4.53311	2.08467	0.323	6.30967	3.56867	24.309	2.26967	6.20467	3.414	3.80633	2.90233	4.21467	6.07267	5.88167	3.96633	3.59133	2.491	2.59967	3.858	4.98197	4.9789	4.8257	1.307	1.05	1.38467	3.694	4.5725	2.954	2.12367	4.05	4.55467	3.902	2.003
Eu	0.363	0.846778	3.084	2.86633	0.375667	0.87	3.26333	1.00733	1.47767	0.983333	0.902	0.764	1.38933	1.049	1.494	1.11433	0.908667	0.921667	0.642333	0.523667	0.730454	0.731408	0.774704	0.379	1.38333	0.462667	1.24567	1.3335	0.876	1.297	0.947	0.941	0.859667	0.584667
Gd	5.29367	4.25122	1.86633	0.396	5.79433	2.83967	18.5357	2.61967	5.59167	2.44767	3.15633	2.11733	3.821	6.49733	5.26133	4.306	4.167	2.19767	2.14633	3.26533	4.65332	4.65129	4.5303	1.20433	1.36	1.64533	3.40367	4.5685	2.96767	2.20333	3.68033	4.23833	3.42333	1.84
Tb	0.797	0.638556	0.798	1.84567	0.917667	0.393333	1.99533	0.440667	0.736667	0.272667	0.402333	0.299333	0.518	1.07567	0.771	0.667333	0.673	0.319	0.292667	0.496667	0.709997	0.709563	0.686407	0.295	0.476667	0.949	0.476333	0.6685	0.433	0.759333	0.475	0.621333	0.545333	0.241
Dy	5.348	4.22989	1.361	0.367333	6.31833	2.53467	10.426	2.89333	4.664	1.64033	2.70633	1.85833	3.46767	6.66867	4.87333	4.86167	4.981	2.30633	1.99967	3.241	4.76931	4.76632	4.59785	1.30433	1.25267	1.80233	3.02433	4.5	3.06	1.975	3.148	4.12533	3.464	1.66833
Ho	1.05733	0.858778	0.873333	1.68733	1.28533	0.518333	1.82133	0.576667	0.842333	0.289667	0.503667	0.359667	0.687667	1.42	0.978667	1.012	1.06967	0.46	0.428333	0.675667	0.969766	0.969197	0.935593	0.406667	0.584	1.18633	0.575667	0.886	0.640333	0.929667	0.600333	0.815333	0.697	0.321667
Er	3.15067	2.49344	1.21667	0.655	3.807	1.59333	5.08	1.66633	2.23233	0.795333	1.52533	1.10167	2.06133	3.979	2.74367	3.057	3.38633	1.42633	1.29067	2.09567	2.83258	2.83069	2.72459	1.02133	0.995667	1.72433	1.64033	2.532	1.923	1.68167	1.88167	2.36333	2.09167	0.984
Tm	0.468333	0.374444	0.536333	2.92267	0.59	0.252333	0.681333	0.241333	0.283	0.113667	0.219667	0.171	0.319	0.609	0.394333	0.463667	0.513333	0.218333	0.212333	0.324	0.430856	0.430586	0.413926	0.246	0.290667	0.749333	0.232667	0.344	0.286	0.495333	0.269	0.349667	0.311667	0.146
Yb	3.42233	2.65333	1.309	0.684	4.24267	1.918	4.80567	1.591	1.75433	0.754667	1.63967	1.254	2.21567	4.28833	2.605	3.284	3.78567	1.63033	1.56733	2.35867	3.06045	3.058	2.92644	1.29567	0.970333	1.84167	1.55167	2.4165	2.07333	1.75833	2.02433	2.38967	2.19333	1.114
Lu	0.510667	0.389444	0.586333	2.75333	0.620333	0.292	0.710667	0.239667	0.241	0.114333	0.258667	0.199333	0.349333	0.6	0.382333	0.506667	0.576333	0.249667	0.247333	0.363333	0.448928	0.44859	0.429815	0.27	0.276	0.777333	0.217	0.36	0.311	0.519667	0.287667	0.372333	0.334333	0.167667
Hf	4.86433	3.22611	3.60467	0.438	4.885	5.05067	9.03	2.28333	1.31433	5.02533	4.793	3.65633	9.09667	4.14033	5.08	3.73633	4.642	4.394	3.16667	3.83033	3.66879	3.66715	3.54737	1.28867	0.771333	1.21133	2.103	2.7985	3.749	2.20567	2.894	3.98633	2.991	2.222
Ta	0.947333	0.533889	0.606	1.62067	1.20033	0.653667	0.798667	0.244333	0.179333	0.313667	0.64	0.874	0.544333	1.42367	0.591667	0.174	0.196	0.435333	0.87	0.877333	0.710483	0.709761	0.660407	0.802667	0.181	1.07933	0.251333	0.2145	0.290333	0.962667	0.560667	0.553667	0.546	0.503333
W	6.60367	1.224	2.21733	1.82133	3.15133	2.259	2.97233	0.279667	0.658667	0.929667	1.376	1.318	0.481667	0.092	0.188333	0.132	0.363	0.543333	0.487667	3.74733	1.72256	1.71984	1.56511	0.322	0.176333	0.968333	0.440667	0.393	0.469333	0.295333	1.567	0.215667	0.197	0.563333
Pb	20.2907	11.9558	1.43267	0.096	23.283	14.039	19.58	20.925	2.67667	18.968	20.8793	22.8253	16.2303	25.6857	12.9053	8.00733	6.031	49.8167	12.502	45.591	14.8357	14.8171	13.8583	6.493	0.507	2.073	5.74933	6.206	7.618	2.184	8.331	9.241	14.1687	22.7013
Th	16.7243	7.78522	1.642	0.137667	19.5173	12.9677	11.6603	2.44733	0.231	4.34333	11.2427	12.8373	6.71167	16.4683	6.556	2.37833	2.50333	9.71533	16.8747	12.7087	10.775	10.7561	9.76974	4.22133	0.184	1.87067	3.70433	2.91	4.52667	3.407	11.655	19.896	9.45567	8.435
U	2.842	1.66178	0.734	0.490667	3.77067	2.51133	3.39167	0.449333	0.043	0.841667	2.95067	1.95467	1.63733	1.911	1.34733	0.579667	0.688333	2.13767	1.56	2.11467	2.20056	2.19722	2.02126	4.67033	0.124	1.49567	0.755	0.692	1.10867	0.709333	2.268	1.80867	1.457	0.968333
Co	n.d.	n.d.	10.855	2.41267	n.d.	5.80133	4.018	9.43767	43.2303	13.9453	8.30233	4.88133	4.22633	3.804	10.931	21.263	n.d.	n.d.	n.d.	n.d.	n.d.	n.d.	n.d.	1.79733	43.3063	0.771333	22.198	22.7455	7.721	16.337	14.667	16.1223	13.0673	7.83967
Ag	n.d.	n.d.	n.d.	n.d.	n.d.	0.03	0.03		0.03	0.03	0.03	0.03	n.d.	n.d.	n.d.	n.d.	n.d.	n.d.	n.d.	n.d.	n.d.	n.d.	n.d.	n.d.	n.d.	n.d.	n.d.	n.d.	n.d.	n.d.	0.03	n.d.	n.d.	n.d.
Sn	n.d.	n.d.	n.d.	n.d.	n.d.	1.94767	3.275	0.615	1.984	1.74267	1.92467	1.534	1.321	2.19	1.93767	1.86467	n.d.	n.d.	n.d.	n.d.	n.d.	n.d.	n.d.	n.d.	n.d.	n.d.	n.d.	n.d.	n.d.	n.d.	2.29233	1.41433	13.067	1.26133
Sb	n.d.	n.d.	n.d.	n.d.	n.d.	12.9427	12.5383	0.398667	6.135	8.87967	6.447	9.91	0.922	3.22667	0.441	0.634667	n.d.	n.d.	n.d.	n.d.	n.d.	n.d.	n.d.	n.d.	n.d.	n.d.	n.d.	n.d.	n.d.	n.d.	11.9647	0.336333	0.466	0.595333
Bi	n.d.	n.d.	n.d.	n.d.	n.d.	0.103333	0.127	0.0493333	0.032	0.0633333	0.0633333	0.026	0.069	0.113333	0.0586667	0.109333	n.d.	n.d.	n.d.	n.d.	n.d.	n.d.	n.d.	n.d.	n.d.	n.d.	n.d.	n.d.	n.d.	n.d.	0.0803333	0.0633333	0.0603333	0.0473333
As	n.d.	n.d.	n.d.	n.d.	n.d.	n.d.	n.d.	5.07	n.d.	n.d.	n.d.	n.d.	4.49433	1.42567	1.108	1.51333	n.d.	n.d.	n.d.	n.d.	n.d.	n.d.	n.d.	n.d.	n.d.	n.d.	n.d.	n.d.	n.d.	n.d.	n.d.	1.81833	1.38733	1.09467
